# Supplementary material for: Growth differentiation factor-15 levels and the risk of contrast induced acute kidney injury in acute myocardial infarction patients treated invasively: A propensity-score match analysis
Source: PLOS journal article supplement (doi:10.1371/journal.pone.0194152), 2018-03-12
Supplement: S1 (10.1371/journal.pone.0194152.s001) [file journal.pone.0194152.s001]

**S1 TABLE Stratification analyses by age and serum creatinine in matched cohort**

|                                                       | n   | $\beta$ | Wald<br>chi-square | P<br>Value | OR (95%CI)          |
|-------------------------------------------------------|-----|---------|--------------------|------------|---------------------|
| GDF-15<br>Per 1000 ng/L<br>(Age>50 years)             | 191 | 1.085   | 6.796              | 0.009      | 2.960(1.309-6.694)  |
| GDF-15<br>Per 1000 ng/L<br>(Age $\leq$ 50 years)      | 21  | -0.045  | 0.001              | 0.971      | 0.956(0.082-11.155) |
| GDF-15<br>Per 1000ng/L<br>(Cr>60 $\mu$ mol/L)         | 194 | 0.959   | 5.515              | 0.019      | 2.609(1.172-5.5810) |
| GDF-15<br>Per 1000 ng/L<br>(Cr $\leq$ 60 $\mu$ mol/L) | 18  | 0.782   | 0.320              | 0.572      | 2.186(0.146-32.817) |

Presented are stratification analyses by age and serum creatinine in a matched cohort with 212 patients.
